# Supplementary material
Source: Research Square preprint supplement (doi:10.21203/rs.3.rs-9224376/v1)
Supplement: Supplementary file 1 [file 7ca81c3e50ee6a37c41623a6.docx]

**Interview guide**

| No. | Question |
| --- | --- |
| 1 | What is your experience when you face a clinical CPR event? |
| 2 | How did the team-based CPR training affect your experience of a clinical CPR event? |
| 3 | What situations have you encountered in clinical practice that are different from simulation training? |
| 4 | How did you feel during the learning transfer from training to clinical practice? |
| 5 | What factors influence your learning transfer from training to clinical practice? |
